# Supplementary material
Source: MDPI journal article supplement (https://www.mdpi.com/2673-9984/2/1/15)
Supplement: s1 [file s1]

# T and C symmetry breaking in Algebraic Quantum Field Theory

---

**Vadim Monakhov**

Associate Professor

Saint-Petersburg State University

[v.v.monahov@spbu.ru](mailto:v.v.monahov@spbu.ru)

1<sup>st</sup> Electronic Conference on Universe 2021



# Mathematical theories of spinors

---

- 1. **Covariant spinors** (matrix columns or rows) - Élie Cartan.
- 2. **Algebraic spinors** - approach is based on theory of Clifford algebras. Matrix representation in a  $2^m$  dimensional complex space in the form of square matrices  $2^m \cdot 2^m$ .
- 3. **Superalgebraic spinors** – extension of the theory of algebraic spinors and of axiomatic algebraic QFT. Theory of  $C^*$ -algebras. Grassmann variables and derivatives with respect to them. CAR-algebra of second quantization of fermions ( CAR – Canonical Anticommutation Relations )



# Theory of superalgebraic spinors

---

1. M. Pavšič. A theory of quantized fields based on orthogonal and symplectic Clifford algebras. *Advances in Applied Clifford Algebras*, 2012, v.22, p.449-481.
2. V. Monakhov. Superalgebraic representation of Dirac matrices. *Theoretical and Mathematical Physics*. 2016. v. 186. p.70–82.
3. V. Monakhov. Dirac matrices as elements of superalgebraic matrix algebra. *Bulletin of the Russian Academy of Sciences: Physics*, 2016, v.80, p. 985–988.
4. V. Monakhov. Superalgebraic structure of Lorentz transformations. *J. of Physics: Conf. Series*, 2018, v.1051, 012023.
5. V. Monakhov. Generalization of Dirac conjugation in the superalgebraic theory of spinors *Theoretical and Mathematical Physics*, 2019, v.200, p.1026-1042.
6. V. Monakhov. Vacuum and spacetime signature in the theory of superalgebraic spinors. *Universe*, 2019, v.5 (7), 162.
7. V. Monakhov. Spacetime and inner space of spinors in the theory of superalgebraic spinors. *Journal of Physics: Conference Series*, 2020, v.1557(1), 12031.
8. V. Monakhov. Generation of Electroweak Interaction by Analogs of Dirac Gamma Matrices Constructed from Operators of the Creation and Annihilation of Spinors. *Bulletin of the Russian Academy of Sciences: Physics*, 2020, Vol. 84, No. 10, pp. 1216–1220.

# 4-component superalgebraic spinors

---

$$\Psi = \int d^3 p \left( \psi^\alpha(p) \frac{\partial}{\partial \theta^\alpha(p)} + \psi^\tau(p) \theta^\tau(p) \right)$$

$$\theta^a(p)^+ = \frac{\partial}{\partial \theta^a(p)}; \left\{ \frac{\partial}{\partial \theta^k(p)}, \theta^l(p') \right\} = \delta_k^l \delta(p - p')$$

$$\frac{\partial}{\partial \theta^1(p)} \cong \begin{pmatrix} 1 \\ 0 \\ 0 \\ 0 \end{pmatrix}, \quad \frac{\partial}{\partial \theta^2(p)} \cong \begin{pmatrix} 0 \\ 1 \\ 0 \\ 0 \end{pmatrix}, \quad \theta^3(p) \cong \begin{pmatrix} 0 \\ 0 \\ 1 \\ 0 \end{pmatrix}, \quad \theta^4(p) \cong \begin{pmatrix} 0 \\ 0 \\ 0 \\ 1 \end{pmatrix}$$

$$\theta^1(p) \cong (1 \ 0 \ 0 \ 0), \quad \theta^2(p) \cong (0 \ 1 \ 0 \ 0)$$

$$\frac{\partial}{\partial \theta^3(p)} \cong (0 \ 0 \ 1 \ 0), \quad \frac{\partial}{\partial \theta^4(p)} \cong (0 \ 0 \ 0 \ 1)$$

# Gamma-operators (analogs of matrices): two additional compared to Dirac's theory!

---

$$\hat{A} = [A, \bullet] \Rightarrow \hat{A}\Psi = [A, \Psi] = A\Psi - \Psi A$$

$$\hat{\gamma}^0 = \int d^3 p \left[ \frac{\partial}{\partial \theta^1(p)} \theta^1(p) + \frac{\partial}{\partial \theta^2(p)} \theta^2(p) + \frac{\partial}{\partial \theta^3(p)} \theta^3(p) + \frac{\partial}{\partial \theta^4(p)} \theta^4(p), \bullet \right]$$

$$\hat{\gamma}^1 = \int d^3 p \left[ \frac{\partial}{\partial \theta^1(p)} \frac{\partial}{\partial \theta^4(p)} - \theta^4(p) \theta^1(p) + \frac{\partial}{\partial \theta^2(p)} \frac{\partial}{\partial \theta^3(p)} - \theta^3(p) \theta^2(p), \bullet \right]$$

$$\hat{\gamma}^2 = i \int d^3 p \left[ -\frac{\partial}{\partial \theta^1(p)} \frac{\partial}{\partial \theta^4(p)} - \theta^4(p) \theta^1(p) + \frac{\partial}{\partial \theta^2(p)} \frac{\partial}{\partial \theta^3(p)} + \theta^3(p) \theta^2(p), \bullet \right]$$

$$\hat{\gamma}^3 = \int d^3 p \left[ \frac{\partial}{\partial \theta^1(p)} \frac{\partial}{\partial \theta^3(p)} - \theta^3(p) \theta^1(p) - \frac{\partial}{\partial \theta^2(p)} \frac{\partial}{\partial \theta^4(p)} + \theta^4(p) \theta^2(p), \bullet \right]$$

$$\hat{\gamma}^4 = i \hat{\gamma}^5 = i \int d^3 p \left[ \frac{\partial}{\partial \theta^1(p)} \frac{\partial}{\partial \theta^3(p)} + \theta^3(p) \theta^1(p) + \frac{\partial}{\partial \theta^2(p)} \frac{\partial}{\partial \theta^4(p)} + \theta^4(p) \theta^2(p), \bullet \right]$$

$$\hat{\gamma}^6 = i \int d^3 p \left[ \frac{\partial}{\partial \theta^1(p)} \frac{\partial}{\partial \theta^2(p)} + \theta^2(p) \theta^1(p) - \frac{\partial}{\partial \theta^3(p)} \frac{\partial}{\partial \theta^4(p)} - \theta^4(p) \theta^3(p), \bullet \right]$$

$$\hat{\gamma}^7 = \int d^3 p \left[ \frac{\partial}{\partial \theta^1(p)} \frac{\partial}{\partial \theta^2(p)} - \theta^2(p) \theta^1(p) + \frac{\partial}{\partial \theta^3(p)} \frac{\partial}{\partial \theta^4(p)} - \theta^4(p) \theta^3(p), \bullet \right]$$

# Operators of annihilation and creation of spinor.

## Operator of generalized Dirac conjugation

---

$$b_{\alpha}(p_i) = \exp(\hat{\gamma}^{0k} \varphi_k) \frac{\partial}{\partial \theta^{\alpha}(0)} \Big|_{p=0 \rightarrow p=p_i}$$

$$\bar{b}_{\alpha}(p_i) = \exp(\hat{\gamma}^{0k} \varphi_k) \theta^l(0) \Big|_{p=0 \rightarrow p=p_i}$$

$$\bar{\Psi} = (M\Psi)^+$$

$$\text{Signature} = (+---) \Rightarrow M = \hat{\gamma}^0$$

$$\bar{b}_{\alpha}(p) = (\hat{\gamma}^0 b_{\alpha}(p))^+$$

$$\bar{\Psi} = (\hat{\gamma}^0 \Psi)^+ = (\bullet)^+ \hat{\gamma}^0 \Psi$$

# Discretization of momentum space. Spinor vacuum

---

$$\left\{ \frac{\partial}{\partial \theta^k(p_i)}, \theta^l(p_j) \right\} = \delta_k^l \frac{1}{\Delta^3 p_i} \delta_j^i; \quad \delta(p_i - p_j) = \frac{1}{\Delta^3 p_i} \delta_j^i$$

$$\left\{ \frac{\partial}{\partial \theta^k(p_i)}, \frac{\partial}{\partial \theta^l(p_j)} \right\} = \{ \theta^k(p_i), \theta^l(p_j) \} = 0$$

$$\Psi_V = \prod_i \Psi_V(p_i)$$

$$\Psi_V(0) = (\Delta^3 p|_{p=0})^4 \frac{\partial}{\partial \theta^1(0)} \theta^1(0) \frac{\partial}{\partial \theta^2(0)} \theta^2(0) \frac{\partial}{\partial \theta^3(0)} \theta^3(0) \frac{\partial}{\partial \theta^4(0)} \theta^4(0)$$

$$\Psi_V(p_i) = (\Delta^3 p_i)^4 b_1(p_i) \bar{b}_1(p_i) b_2(p_i) \bar{b}_2(p_i) b_3(p_i) \bar{b}_3(p_i) b_4(p_i) \bar{b}_4(p_i)$$

## Properties of the spinor vacuum

---

$$\Psi_V(p_i)^+ = \Psi_V(-p_i) \Rightarrow \Psi_V^+ = \Psi_V$$

$$(\Psi_V)^2 = \Psi_V$$

$$b_1(p_i)\Psi_V = 0, \text{ annihilation operator}$$

$$\bar{b}_1(p_i)\Psi_V \neq 0, \text{ creation operator}$$

$\Psi_V$  is primitive Hermitian idempotent.



# Alternative spinor vacuum

---

$\hat{\gamma}^1, \hat{\gamma}^2, \hat{\gamma}^3, \hat{\gamma}^5, \hat{\gamma}^6, \hat{\gamma}^7$  – change  $\Psi_V$  to  $\Psi_{\text{alt}}$

$\hat{\gamma}^0$  – keeps  $\Psi_V$

$$\Psi_{\text{altV}}(0) = (\Delta^3 p |_{p=0})^4 \theta^1(0) \frac{\partial}{\partial \theta^1(0)} \theta^2(0) \frac{\partial}{\partial \theta^2(0)} \theta^3(0) \frac{\partial}{\partial \theta^3(0)} \theta^4(0) \frac{\partial}{\partial \theta^4(0)}$$

$$\Psi_{\text{altV}}(p_i) = (\Delta^3 p_i)^4 \bar{b}_1(p_i) b_1(p_i) \bar{b}_2(p_i) b_2(p_i) \bar{b}_3(p_i) b_3(p_i) \bar{b}_4(p_i) b_4(p_i)$$

$$\Psi_{\text{altV}} = \prod_i \Psi_{\text{altV}}(p_i)$$

$\bar{b}_k(p_i)$  – annihilation operator

$b_k(p_i)$  – creation operator

# Clifford algebra: operators of reflection

---

Operator  $A$  transforms Clifford vector  $X$  as

$$X' = AXA^{-1} = (\lambda A)X(\lambda A)^{-1},$$

i.e.  $A$  is defined up to numerical factor  $\lambda$

Operator  $A$  transforms spinor  $\Psi$  as

$$\Psi' = A\Psi,$$

$$(\Psi', \Psi') = (\Psi, \Psi) \Rightarrow \lambda = e^{i\varphi}$$

$$A = i\hat{\gamma}^0 \Rightarrow \hat{\gamma}^{0'} = \hat{\gamma}^0, \hat{\gamma}^{k'} = -\hat{\gamma}^k, k = 1, 2, 3, 6, 7, 5 - \text{reflects } \hat{\gamma}^k$$

$$A = \hat{\gamma}^{ab} \Rightarrow \hat{\gamma}^{a'} = -\hat{\gamma}^a, \hat{\gamma}^{b'} = -\hat{\gamma}^b, \hat{\gamma}^{c'} = \hat{\gamma}^c, a \neq c \neq b$$

– reflects  $\hat{\gamma}^a$  and  $\hat{\gamma}^b$

# CAR algebra: operators of reflection

---

Operator  $A$  transforms Clifford vector  $X$  as

$$X' = AXA^{-1} = (\lambda A)X(\lambda A)^{-1}, \text{ numerical factor } \lambda$$

Operator  $A$  transforms spinor  $\Psi$  as

$$\Psi' = A\Psi, \text{ numerical factor } \lambda = e^{i\varphi}.$$

New: Operator  $A$  transforms antispinor  $\bar{\Psi}$  as

$$\Psi' = A\bar{\Psi}.$$

New: CAR algebra  $\left\{ \lambda \frac{\partial}{\partial \theta^k(p)}, \lambda \theta^l(p') \right\} = \delta_k^l \delta(p - p')$

$$\Rightarrow \lambda^2 = 1 \Rightarrow \lambda = \pm 1$$

# R-operators

---

$$d\hat{G} = [dG, \bullet]$$

$$(1 + d\hat{G})\Psi_1\Psi_2\dots\Psi_k = 1 + [dG, \Psi_1]\Psi_2\dots\Psi_k + \Psi_1[dG, \Psi_2]\dots\Psi_k + \dots = \\ = (e^{d\hat{G}}\Psi_1)(e^{d\hat{G}}\Psi_2)\dots(e^{d\hat{G}}\Psi_k)$$

$$e^{\hat{G}}\Psi_1\Psi_2\dots\Psi_k = (e^{\hat{G}}\Psi_1)(e^{\hat{G}}\Psi_2)\dots(e^{\hat{G}}\Psi_k)$$

$$R_{\hat{G}} = e^{\hat{G}} \text{ - it is R - operator}$$

Other R - operators :

Complex conjugation  $(\bullet)^*$ , transposition  $(\bullet)^T$ ,

Hermitian conjugation  $(\bullet)^+ = (\bullet)^T (\bullet)^*$

# Operators Q and P

$$\hat{Q} = i\hat{\gamma}^6\hat{\gamma}^7 =$$

$$\int d^3p \left[ \frac{\partial}{\partial\theta^1(p)}\theta^1(p) + \frac{\partial}{\partial\theta^2(p)}\theta^2(p) - \frac{\partial}{\partial\theta^3(p)}\theta^3(p) - \frac{\partial}{\partial\theta^4(p)}\theta^4(p), \bullet \right]$$

– generator of rotations in the plane  $\hat{\gamma}^6, \hat{\gamma}^7$ .

Operator of charge in the theory of second quantization.

$$\hat{Q}\Psi = \Psi, \quad \hat{Q}\bar{\Psi} = -\bar{\Psi},$$

$$e^{i\hat{Q}\varphi}\Psi = e^{i\varphi}\Psi, \quad e^{i\hat{Q}\varphi}\bar{\Psi} = e^{-i\varphi}\bar{\Psi}.$$

$$P = R_x R_{i\hat{\gamma}^0} R_{\hat{\gamma}^{67}} = R_x R_{\hat{\gamma}^0} \hat{Q} \text{ – spatial reflection}$$

## Operator T of time reflection

---

$$T_1 = R_{-x^0} R_{\hat{\gamma}^1 \hat{\gamma}^3} (\bullet)^*, \quad \Psi_V \rightarrow \Psi_V$$

“Rewinding the film”, annihilation operator  
must become creation one, and vice versa

$$R = R_{\hat{\gamma}^{05}} R_{\hat{\gamma}^{26}} (\bullet)^T \text{ – reverse } R\Psi_1\Psi_2\dots\Psi_k = \Psi_k\dots\Psi_2\Psi_1$$

$$R\Psi_V = \Psi_{alt}, R\Psi = \Psi, R\bar{\Psi} = \bar{\Psi}$$

$$T = RT_1 = R_{-x^0} R_{\hat{\gamma}^7} (\bullet)^+, \quad \Psi_V \rightarrow \Psi_{alt}$$

# Charge conjugation C

---

CPT operator must be antiunitary. Operator P is unitary, T is antiunitary and reversing vacuum. Therefore, charge conjugation operator C must be unitary and reversing vacuum.

$$C_1 = R_{-q} R_{i\hat{\gamma}^{56}}, \quad \Psi_V \rightarrow \Psi_V$$

$$C = RC_1 = R_{-q} R_{-i\hat{\gamma}^{02}} (\bullet)^T, \quad \Psi_V \rightarrow \Psi_{alt}$$

# Conclusion 1

---

$$P = R_{-x^k} R_{\hat{\gamma}^0} \hat{Q}, \quad \Psi_V \rightarrow \Psi_V,$$

$$T = R_{-x^0} R_{\hat{\gamma}^7} (\bullet)^+, \quad \Psi_V \rightarrow \Psi_{alt}, \text{ breaks symmetry}$$

$$C = R_{-q} R_{-i\hat{\gamma}^{02}} (\bullet)^T, \quad \Psi_V \rightarrow \Psi_{alt}, \text{ breaks symmetry}$$

$$CPT = R_{-q} R_{-x^\mu} J_+, \quad \Psi_V \rightarrow \Psi_V$$

$$J_+ = R_{\hat{\gamma}^{26}} (\bullet)^* \text{ -- operator of real structure}$$

(charge conjugation) in Krein spaces.





## Conclusion 2

---

- Operators T and C are not consistent with vacuum of the Universe.
- They can only be approximate symmetry operators.
- The symmetry breaking is small when spinor is independent particle.
- Vacuum is multiparticle state.
- P, TC, CPT can be exact symmetry operators of spinors.
